# Supplementary material for: Single‐cell transcriptomics reveals distinct inflammation‐induced microglia signatures
Source: PubMed Central journal article supplement — EMBO Rep. 2018 Sep 11;19(11):e46171. doi: 10.15252/embr.201846171 (PMC6216255; doi:10.15252/embr.201846171), 2018-09-11
Supplement: EMBR-19-e46171-s001.pdf [file EMBR-19-e46171-s001.pdf]

## **Appendix**

### **Single-cell transcriptomics reveals distinct inflammation-induced microglia signatures**

**Sousa et al.**

#### **Table of contents:**

##### **Appendix Figures S1-S5**

Appendix Figure S1 – Page 2

Appendix Figure S2 – Page 3

Appendix Figure S3 – Page 4

Appendix Figure S4 – Page 5

Appendix Figure S5 – Page 6

Appendix Figure S6 – Page 7

##### **Appendix Tables S1-S3**

Appendix Table S1 – Page 8

Appendix Table S2 – Page 9

Appendix Table S3 – Page 10

## Appendix Fig. S1

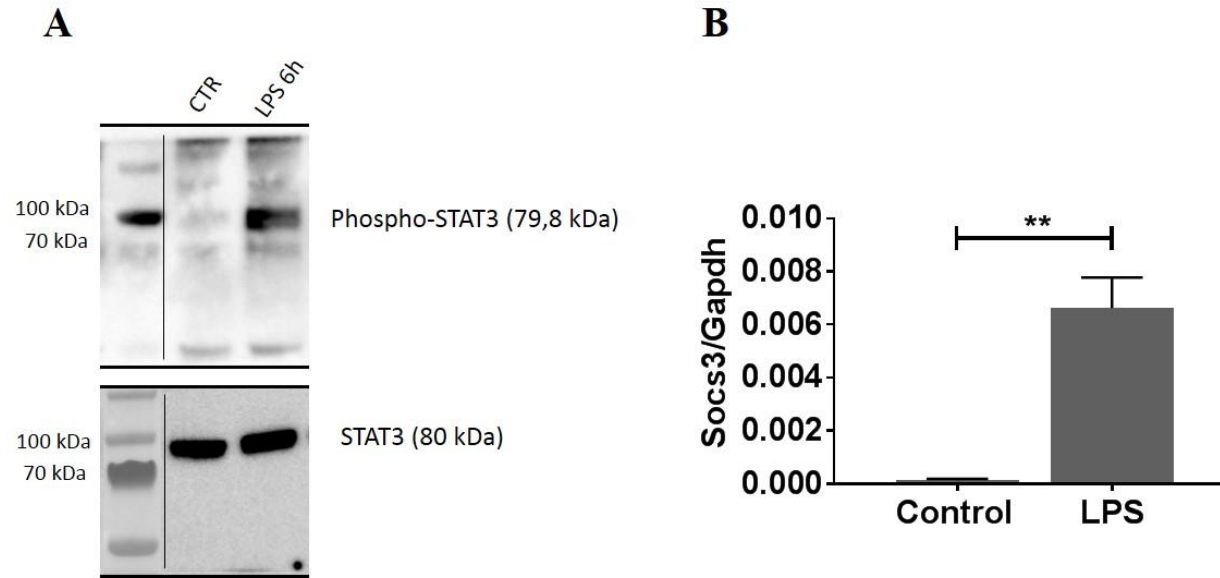

**Appendix Figure S1. STAT3 phosphorylation and *Socs3* expression levels are upregulated following LPS exposure.** (A) Western blot analysis representative of 2 independent experiments showing the phosphorylated form of STAT3 (upper panel) and total STAT3 levels (bottom panel). Total proteins were isolated from neonatal cultivated microglia treated for 6 hours with LPS (1 ng/ml) or left untreated. (B) Neonatal cells were stimulated for 6 hours with LPS (1 ng/ml) or left untreated. Expression levels of *Socs3* were analysed by qPCR. Bars represent mean of relative expression (*Gapdh* as housekeeping gene)  $\pm$  SEM (\*\*p < 0.01 by two-tailed Student's test; n=3).

## Appendix Fig. S2

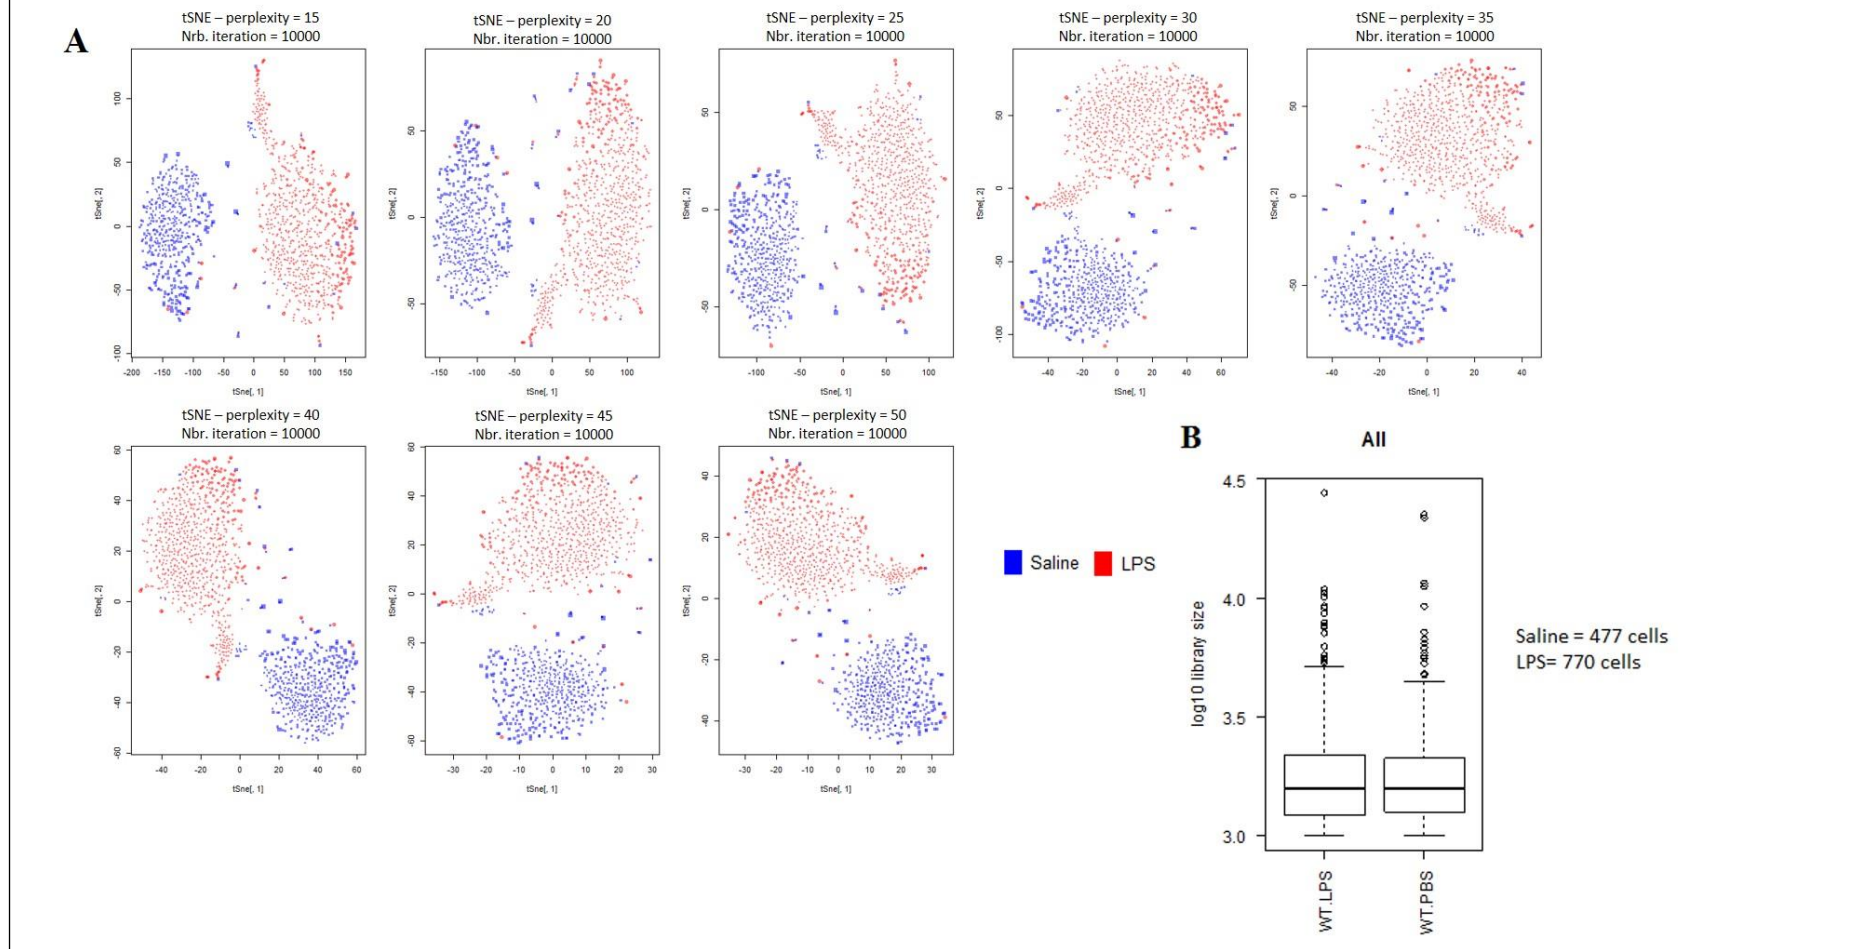

**Appendix Figure S2. Evaluation of the perplexity parameter and library size.** (A) The perplexity parameter, an estimate of the number of effective neighbours, does not affect the 2D-tSNE clustering representation. For subsequent 2d-tSNE analysis, a perplexity of 30 was selected. (B) Library size for 477 cells in the saline and 770 cells in the LPS samples.

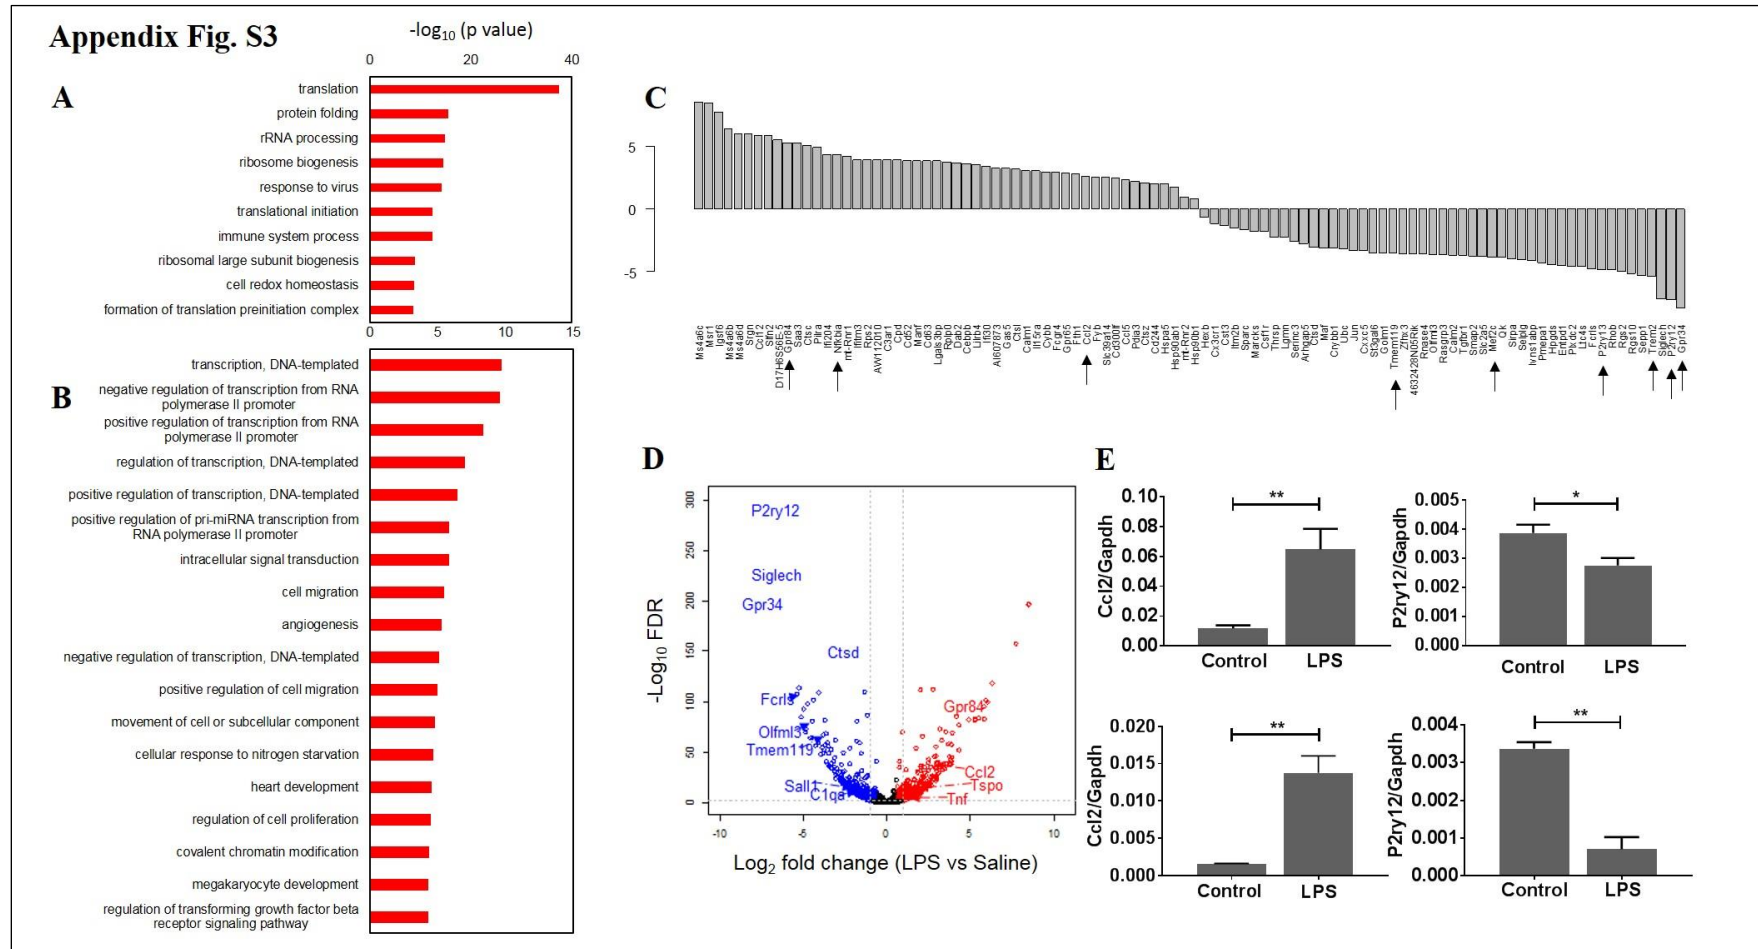

**Appendix Figure S3. Microglia isolated from LPS-injected mice are activated.** (A-B) Top biological processes identified by Database for Annotation, Visualization and Integrated Discovery (DAVID) resulting from (A) upregulated and (B) downregulated genes under LPS treatment versus control conditions. (C) Bars plot of log<sub>2</sub> fold changes between 770 microglial cells isolated from LPS-injected mice and 477 microglia in steady state (top 50 up-regulated and top 50 down-regulated genes; FDR<0.05). (D) Volcano plot showing the fold change of genes (log<sub>2</sub> scale) between microglia isolated from LPS-injected mice to steady state microglia (x axis) and their significance (y axis, -log<sub>10</sub> FDR). A selection of highly significant upregulated (*Gpr84*, *Ccl2*, *Tspo*, *Tnf*) or downregulated (*P2ry12*, *Siglech*, *Gpr34*, *Ctsd*, *Fcrl3*, *Olfml3*, *Tmem119*, *Sall1*, *C1qa*) genes is included. P values were determined by Mann-Whitney U test with FDR correction. (E) Primary adult microglia (upper panels) were

cultivated in the presence of TGF- $\beta$  (50  $\mu$ g/ml) and M-CSF (10 ng/ml), while neonatal cells (bottom panels) were stimulated for 24 hours with TGF- $\beta$  (50  $\mu$ g/ml) followed by 6 hours stimulation with LPS (1 ng/ml) or left untreated. Expression levels of *Ccl2* and *P2ry12* were analysed by qPCR. Bars represent mean of relative expression (*Gapdh* as housekeeping gene)  $\pm$  SEM (\* $p$  < 0.05; \*\* $p$  < 0.01 by two-tailed Student's test;  $n=3$ ).

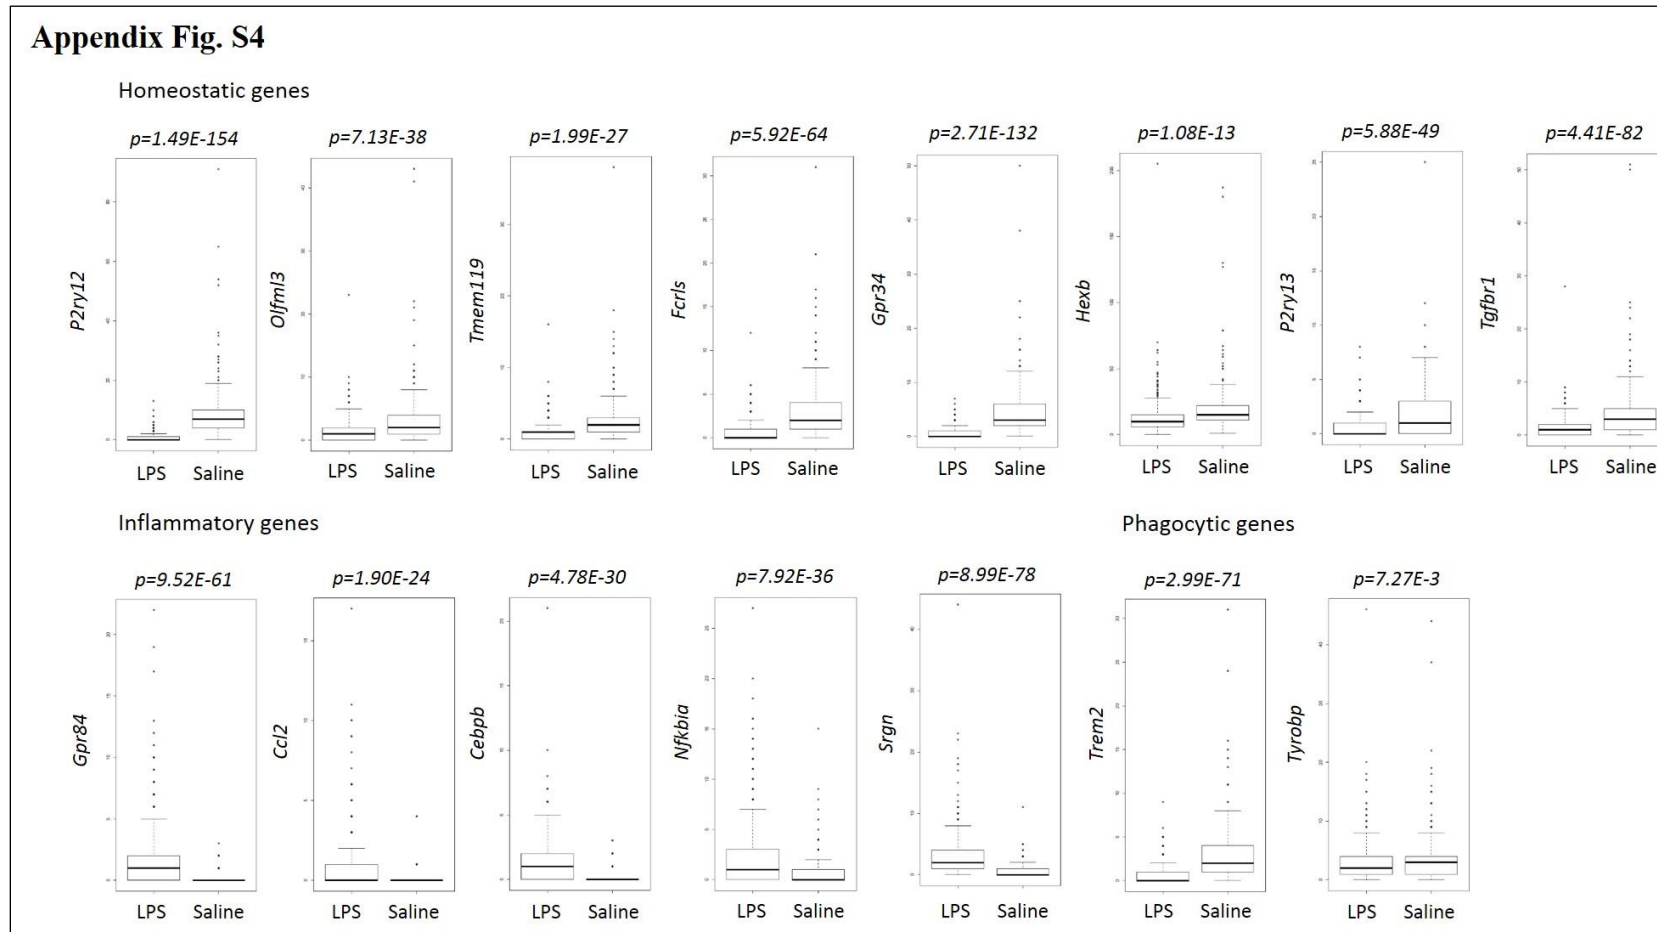

**Appendix Figure S4. Comparison between microglia isolated from LPS-injected and control mice at single-cell level. Bar plots showing mean expression (UMI count) of selected genes across LPS and control clusters.**

Appendix Fig. S5

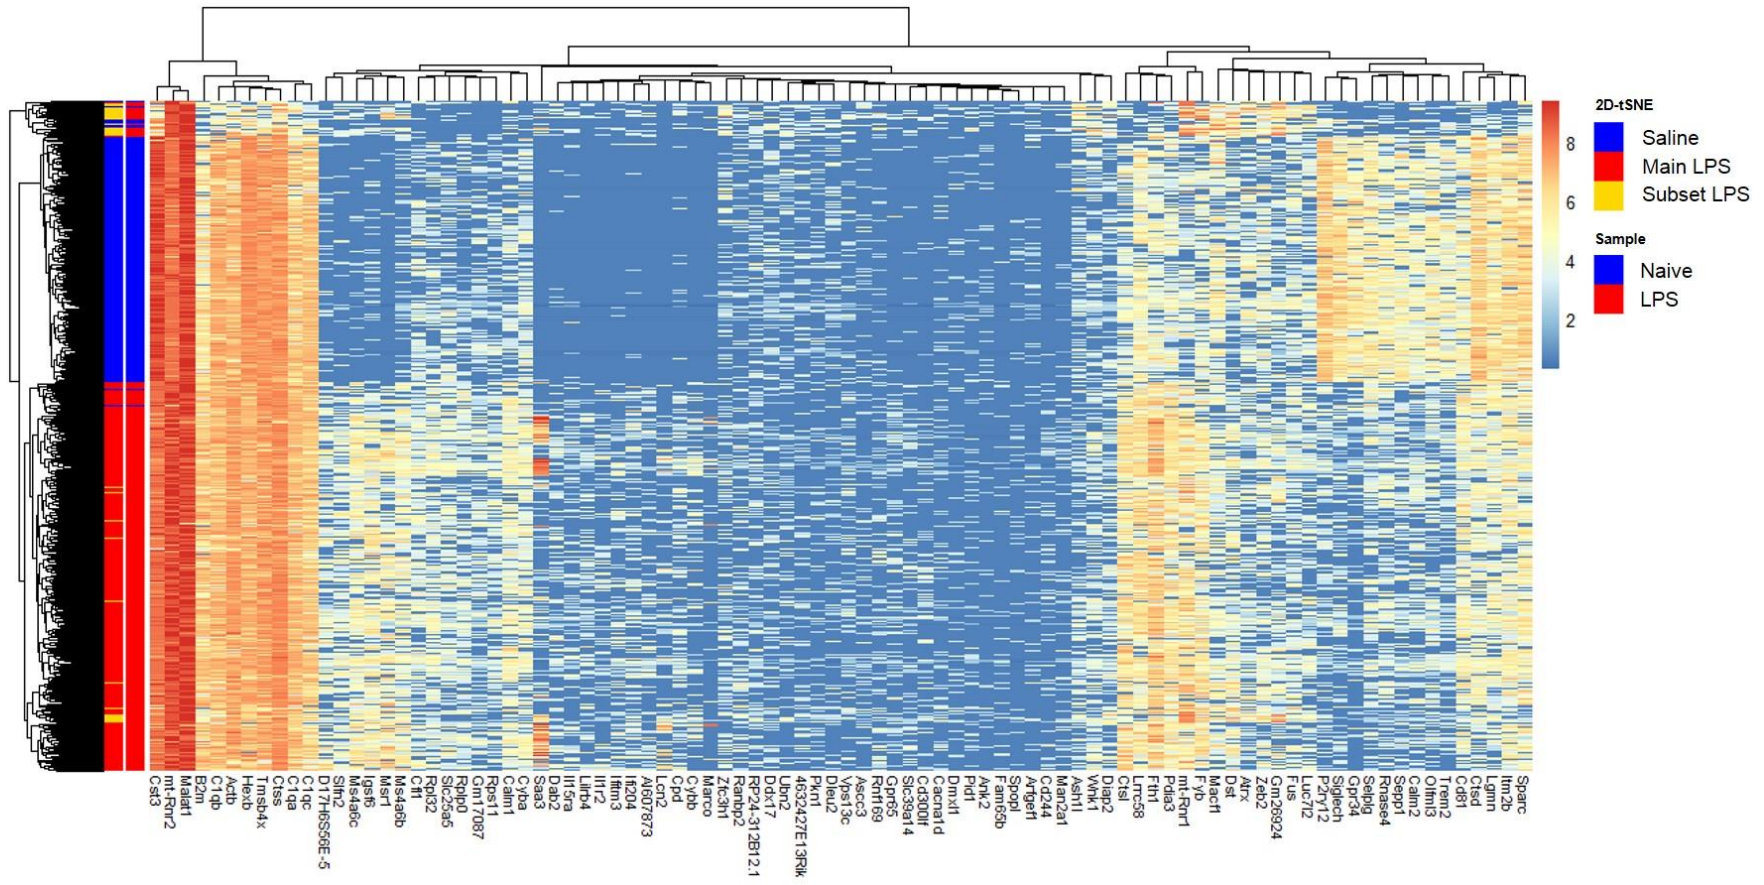

**Appendix Figure S5. Microglia heterogeneity at the single-cell level.** Heatmap showing clustering analysis of 1,247 single cells, featuring top 100 differentially expressed genes (FDR<0.05) between all the clusters identified by 2D-tSNE (naïve, blue; main LPS, red; subset LPS, yellow).

## Appendix Fig. S6

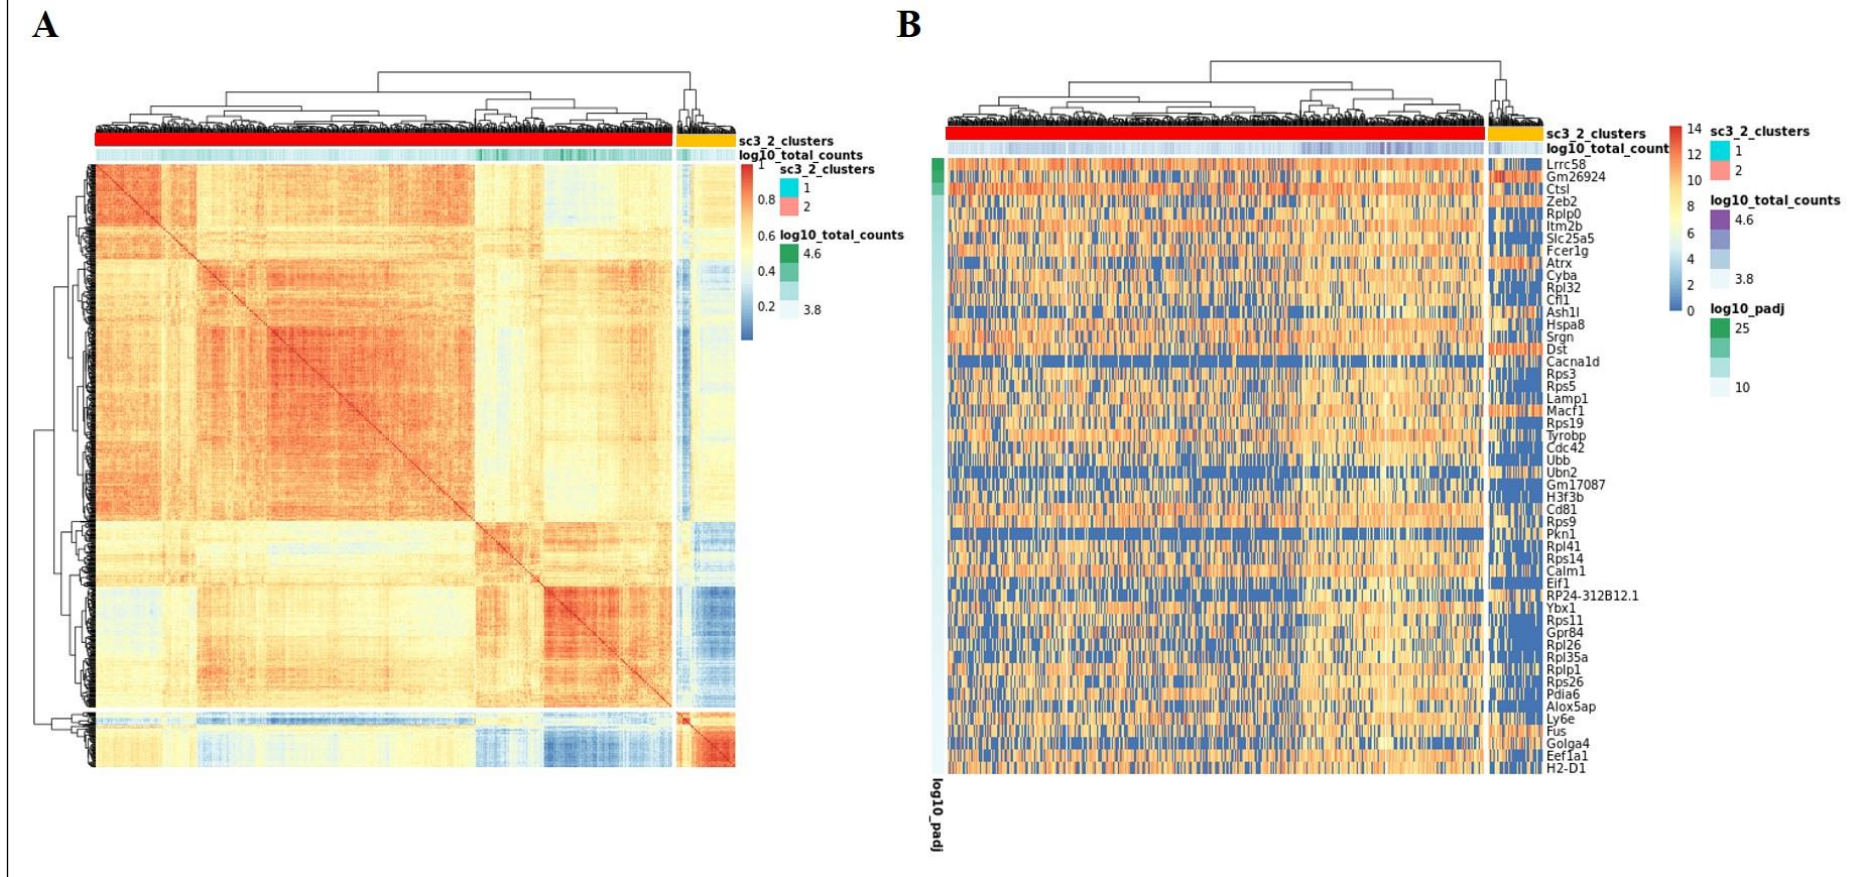

**Appendix Figure S6. Validation of the existence of the identified inflammatory subpopulations by the “SC3” method. (A)** Clustering analysis performed using the “SC3” package to identify clusters of cells showing similarity in their transcriptomic profiles (hierarchical clustering,  $\log_2$  outlier score,  $\log_{10}$  total counts and gene expression levels). K-means clustering distinguished 2 clusters under inflammatory conditions with an average silhouette width of 0.49. **(B)** Heatmap showing top 50 differentially expressed genes driving the segregation of cells into the two identified clusters by “SC3” (adjusted p value < 0.05).

**Appendix Table S1. List of top differentially expressed genes unique to “main LPS”, “subset LPS” or DAM versus naive (FDR<0.05; upregulated genes, Log2FC≥3; downregulated genes, Log2FC≤-3).**

| Up DAM  | Down DAM      | Up Main LPS | Down Main LPS | Up Subset LPS | Down Subset LPS |
|---------|---------------|-------------|---------------|---------------|-----------------|
| Itgax   | Zw10          | Rps2        | Rasgrp3       | Gm26924       | Lamp1           |
| Mamdc2  | Cebpd         | Manf        |               | Golga4        | Gm17087         |
| Fam20c  | Trnt1         | Pdia4       |               | Zfc3h1        | Cd68            |
| Ccl4    | D14Abb1e      | Calm1       |               | RP24-312B12.1 | Rps14           |
| Lmbrd2  | Stambpl1      | Pdia6       |               | Stab1         | Itm2c           |
| Egr2    | Gpam          | C5ar1       |               | Cacna1d       | Eif1            |
| Csf1    | E2f3          | Gnl3        |               | Ash1l         | H3f3b           |
| Clec7a  | Fyco1         |             |               | Ascc3         | Cd81            |
| Baia2l2 | Mtx3          |             |               | Atrx          | Ubb             |
| Ank     | Gbp7          |             |               | Ttc14         | Lrrc58          |
| Zfp692  | Rbm7          |             |               | Chd7          |                 |
| Axl     | Dcun1d2       |             |               | Myo9a         |                 |
| Igf1    | C1rl          |             |               |               |                 |
| Gpnmb   | Ftsj2         |             |               |               |                 |
| Ildr2   | Sdccag3       |             |               |               |                 |
| Fxyd6   | Rassf1        |             |               |               |                 |
| Psat1   | Ovca2         |             |               |               |                 |
| St14    | E230001N04Rik |             |               |               |                 |
| Birc5   | Gnb4          |             |               |               |                 |
| Cdca8   | Mrpl37        |             |               |               |                 |
| H2-Q7   | Ppfibp2       |             |               |               |                 |
| Etl4    | BC005561      |             |               |               |                 |
| Ifit2   | Hist1h2be     |             |               |               |                 |
| Slc1a2  | Ggta1         |             |               |               |                 |
| Pycrl   | Dbp           |             |               |               |                 |
| Lgi2    | Pdlim5        |             |               |               |                 |
| Ero1lb  | SCARNA16      |             |               |               |                 |
| Nceh1   | Diexf         |             |               |               |                 |
| Ch25h   | Zfp141        |             |               |               |                 |
| Got1    | Klf2          |             |               |               |                 |
|         | Filip1l       |             |               |               |                 |
|         | Clec4a2       |             |               |               |                 |
|         | Mex3b         |             |               |               |                 |
|         | Zfp398        |             |               |               |                 |
|         | Ggt5          |             |               |               |                 |
|         | Ccl24         |             |               |               |                 |
|         | Rmnd5b        |             |               |               |                 |
|         | Tgm2          |             |               |               |                 |
|         | Nsun6         |             |               |               |                 |



|  |               |  |  |  |  |
|--|---------------|--|--|--|--|
|  | 3110062M04Rik |  |  |  |  |
|  | Cspp1         |  |  |  |  |

**Appendix Table S2. List of FACS chemical compounds and antibodies.**

| <b>Antibodies FACS</b>                            | <b>Brand</b>     | <b>Cat No</b> | <b>µl/tube (100 µl)</b> |
|---------------------------------------------------|------------------|---------------|-------------------------|
| <b>Hoechst (Bisbenzimidide)</b>                   | Sigma-Aldrich    | 33342         | 1 µl                    |
| <b>Sytox Red</b>                                  | ThermoFisher     | S34859        | 1 µl                    |
| <b>CD16/32</b>                                    | eBioscience      | 14-0161-85    | 10 µl                   |
| <b>mLy6C PB</b>                                   | Biolegend        | 128014        | 0.5 µl                  |
| <b>iso IgG2a BV606 400540</b>                     | Biolegend        | 400540        | 5 µl                    |
| <b>mCD45 FITC</b>                                 | eBioscience      | 11-0454-82    | 1 µl                    |
| <b>mCD11b Percp_Cy5.5</b>                         | eBioscience      | 550993        | 5 µl                    |
| <b>iso IgG Goat IC108P</b>                        | R&D              | IC1 8P        | 5 µl                    |
| <b>mCD206 APC</b>                                 | Biolegend        | 141708        | 2.5 µl                  |
| <b>mCD11c APC_Cy7</b>                             | Biolegend        | 117324        | 5 µl                    |
| <b>mCD86 APC_Cy7</b>                              | Biolegend        | 105029        | 6 µl                    |
| <b>mCD45 FITC</b>                                 | ImmunoTools      | 22270453      | 5 µl                    |
| <b>mCD11b PE</b>                                  | eBioscience      | 12011281      | 1 µl                    |
| <b>mCD206 PE_Cy7</b>                              | Biolegend        | 141719        | 2.5 µl                  |
| <b>mCD86 BV605</b>                                | Biolegend        | 105037        | 5 µl                    |
| <b>mTMEM119</b>                                   | abcam            | ab210405      | 2.5 µl                  |
| <b>Alexa Fluor®647 goat anti-rabbit IgG (H+L)</b> | Molecular Probes | A-21244       | 2.5 µl                  |
| <b>mP2RY12 PE</b>                                 | Biolegend        | 848003        | 5 µl                    |
| <b>mTMEM119</b>                                   | abcam            | ab210405      | 2.5 µl                  |
| <b>mCD44 PE_Cy7</b>                               | Biolegend        | 103030        | 1.2 µl                  |
| <b>mCD274 APC</b>                                 | Biolegend        | 124311        | 2.5 µl                  |
| <b>mNOTCH4 PE_Cy7</b>                             | Biolegend        | 128407        | 5 µl                    |

|          |     |          |      |
|----------|-----|----------|------|
| mCCR2 PE | R&D | FAB5538P | 5 µl |
|----------|-----|----------|------|

**Appendix Table S3. PCR primer sequences.**

| <b>Gene</b>    | <b>PCR primer sequence (5'-3')</b>                                  |
|----------------|---------------------------------------------------------------------|
| <i>Gapdh</i>   | Forward: TGC GACTTCAACAGCAACTC<br>Reverse: CTTGCTCAGTGTCTTGCTG      |
| <i>Olfml3</i>  | Forward: TGTTAGACGGCACCCAGAAC<br>Reverse: CCACTGTTTCGGTTTGCCAAG     |
| <i>Fcrls</i>   | Forward: TTCTGGTCTTCGCTCCTGTC<br>Reverse: ACCGCGTCTTGCATTCCTAA      |
| <i>Tmem119</i> | Forward: TGCAATGTCGCTGTC ACTCT<br>Reverse: AGTTTGTGTTTCCACGGGGT     |
| <i>Siglech</i> | Forward: ATCCAGCTCAATGTCACCTATAAT<br>Reverse: GCTTCTCCCATGGCTACCTG  |
| <i>Gpr34</i>   | Forward: GGAAAGCTTCAACTCAGTTCCTG<br>Reverse: TCCATGAGAGGAGCAAAGCC   |
| <i>P2ry12</i>  | Forward: GTGCAAGGGGTGGCATCTA<br>Reverse: TGGA ACTTGCAGACTGGCAT      |
| <i>Mef2c</i>   | Forward: TAACACAGGCGGTCTGATGG<br>Reverse: TTATCCTTTGATTC ACTGATGGCA |
| <i>Itgb5</i>   | Forward: GTCCA ACTTGACGGTCCTCC<br>Reverse: TACAGGGGGTTTGAGGCCATT    |
| <i>Sall1</i>   | Forward: CGTGAGCGGCTGATGTTTGA<br>Reverse: CTTAGTGGGGCGACTTGGTT      |
| <i>Hexb</i>    | Forward: CGCAGTCCCCGCGTAG<br>Reverse: AGTTGTAATATCGCCGAAACGC        |
| <i>Tgf-β1</i>  | Forward: ATGCTAAAGAGGTCACCCGC<br>Reverse: TGCTTCCCGAATGTCTGACG      |
| <i>Aif1</i>    | Forward: CAGGGATTTGCAGGGAGGAAA<br>Reverse: AGTTTGGACGGCAGATCCTC     |
| <i>Cx3cr1</i>  | Forward: CCCATCTGCTCAGGACCTCAC<br>Reverse: GGCCTCAGCAGAATCGTCAT     |

|                       |                                                                      |
|-----------------------|----------------------------------------------------------------------|
| <b><i>Merik</i></b>   | Forward: ACATACCAAGAAACAGCTGGCA<br>Reverse: TAAGGGAGTCCTTGA ACTTCCAC |
| <b><i>Ctss</i></b>    | Forward: CCACGCTGCCATCAGAAGA<br>Reverse: TGCCCACTTGGTAGGTATGC        |
| <b><i>Tyrobp</i></b>  | Forward: ATGCGACTGTTCTTCCGTGA<br>Reverse: TTGTTTCCGGGTCCCTTCC        |
| <b><i>Trem2</i></b>   | Forward: CTTGCTGGAACCGTCACCAT<br>Reverse: ACAGGATGAAACCTGCCTGGA      |
| <b><i>Itgam</i></b>   | Forward: GCTCGACACCATCGCATCTA<br>Reverse: TGGTACTTCCTGTCTGCGTG       |
| <b><i>Itgax</i></b>   | Forward: TTTGGCTTCCCAGACTTGAAGA<br>Reverse: TGCTGTCACACATGAGGTGC     |
| <b><i>Gfap</i></b>    | Forward: AGAAAGGTTGAATCGCTGGA<br>Reverse: TCTTGCATGTTACTGGTGGC       |
| <b><i>Gjb6</i></b>    | Forward: ACCATGCCCTGAAAGAGAGC<br>Reverse: GGGCTCACCTACACTTGACC       |
| <b><i>Ntsr2</i></b>   | Forward: GGTGAGACACAAGGATGCCA<br>Reverse: CAGTCCATCCATCATCGGGG       |
| <b><i>Aldh1l1</i></b> | Forward: ATTCCCAAGGGTGTGGTCAAC<br>Reverse: CATCAGGGTGGTCTGAGAGTCTCT  |
| <b><i>Mobp</i></b>    | Forward: CAGACCGGCACGGATGAAAA<br>Reverse: CCTCCTCAATCTAGTCTTCTGGC    |
| <b><i>Mog</i></b>     | Forward: TGCTGACTCTCATCGCACTT<br>Reverse: CTTCGGTGCAGCCAGTTGTA       |
| <b><i>Cldn1</i></b>   | Forward: TTGCTCTTTCCTCGGGCATT<br>Reverse: GGCTTCCACTGTTCGTTGGTA      |
| <b><i>Tubb3</i></b>   | Forward: TGAGGCCTCCTCTCACAAGTA<br>Reverse: CCGCACGACATCTAGGACTG      |
| <b><i>Vglut1</i></b>  | Forward: GCCATCTCTGGGTTTAACGTG<br>Reverse: AACACGTA CTGCCACTCCTC     |
| <b><i>NeuN</i></b>    | Forward: ACACACACACTCCATACTGAGG<br>Reverse: GCTCTGGGCTCTCTGTTTGC     |
| <b><i>Ly6c1</i></b>   | Forward: GTGTGCAGAAAGAGCTCAGG                                        |

|                               |                                                                    |
|-------------------------------|--------------------------------------------------------------------|
|                               | Reverse: GAAAGGCACTGACGGGTCTT                                      |
| <i>Mrc1</i>                   | Forward: AGTGGCAGGTGGCTTATG<br>Reverse: GGTCAGGAGTTGTTGTGG         |
| <i>Arg-1</i>                  | Forward: AGACAGCAGAGGAGGTGAAGAG<br>Reverse: CGAAGCAAGCCAAGGTAAAGC  |
| <i>Il-1<math>\beta</math></i> | Forward: GCTTCAGGCAGGCAGTATC<br>Reverse: AGGATGGGCTCTTCTTCAAAG     |
| <i>Tnf</i>                    | Forward: GGTTCTGTCCCTTTCACCTCAC<br>Reverse: TGCCTCTTCTGCCAGTTCC    |
| <i>Ccl2</i>                   | Forward: CACTCACCTGCTGCTACTCATTC<br>Reverse: GCTTCTTTGGGACACCTGCTG |
| <i>Ccr2</i>                   | Forward: AGCCATACCTGTAAATGC<br>Reverse: GCCGTGGATGAACTGAGGTA       |
| <i>Socs3</i>                  | Forward: TAGACTTCACGGCTGCCAAC<br>Reverse: CGGGGAGCTAGTCCCGAAG      |
