# Supplementary figures and images for: Single‐cell transcriptomics reveals distinct inflammation‐induced microglia signatures
Source: PubMed Central journal article supplement — EMBO Rep. 2018 Sep 11;19(11):e46171. doi: 10.15252/embr.201846171 (PMC6216255; doi:10.15252/embr.201846171), 2018-09-11

# Appendix Fig. S1A

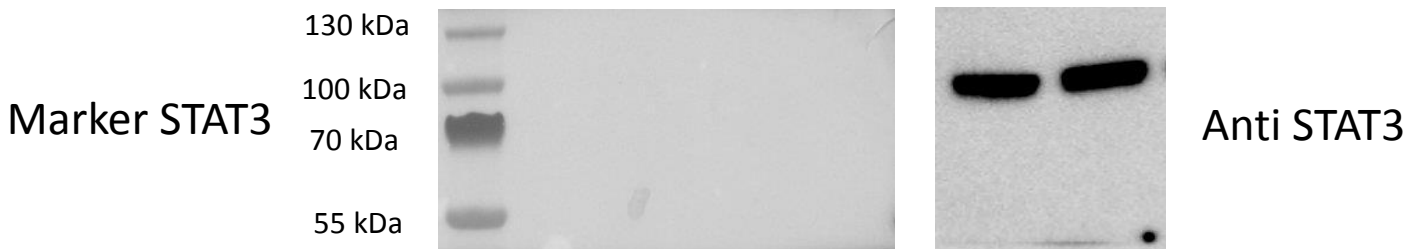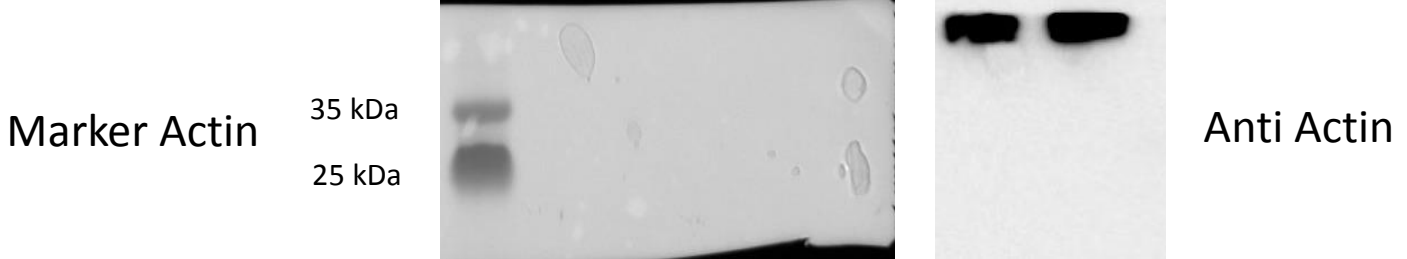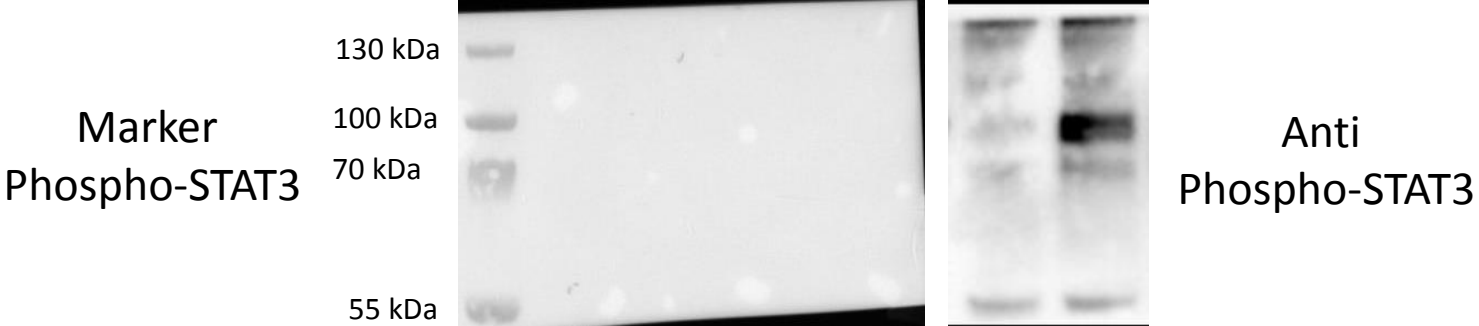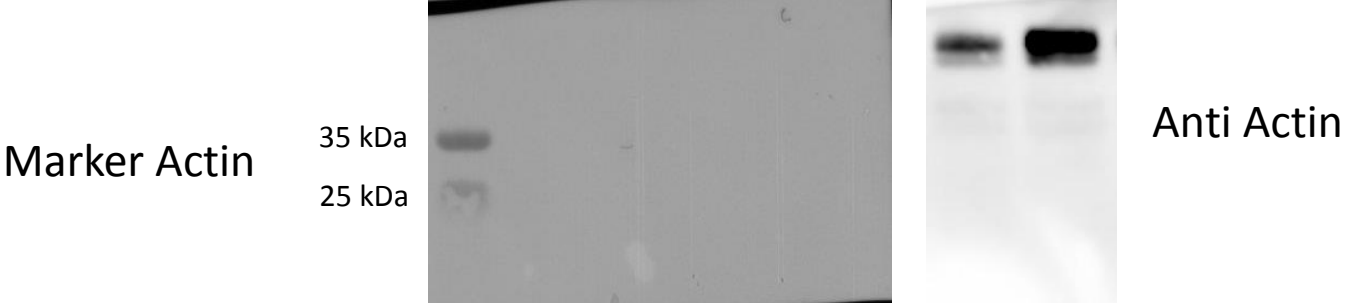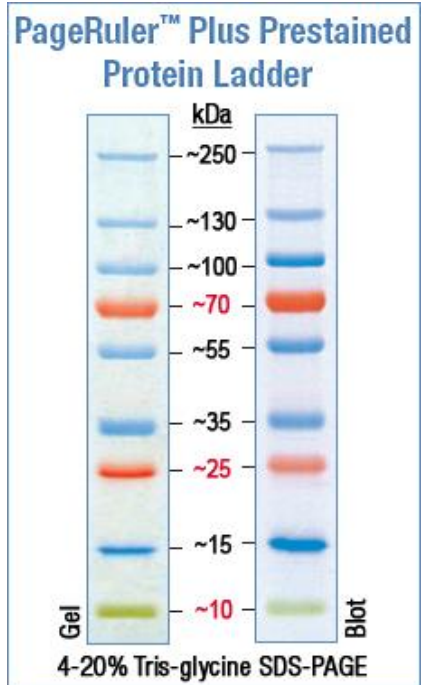

Supplement: EMBR-19-e46171-s008.pdf [file EMBR-19-e46171-s008.pdf]
